# Supplementary material for: RNAseq by Total RNA Library Identifies Additional RNAs Compared to Poly(A) RNA Library
Source: Hindawi journal article supplement (doi:10.1155/2015/862130), 2015-01-01
Supplement: f1 [file 862130.f1.pdf]

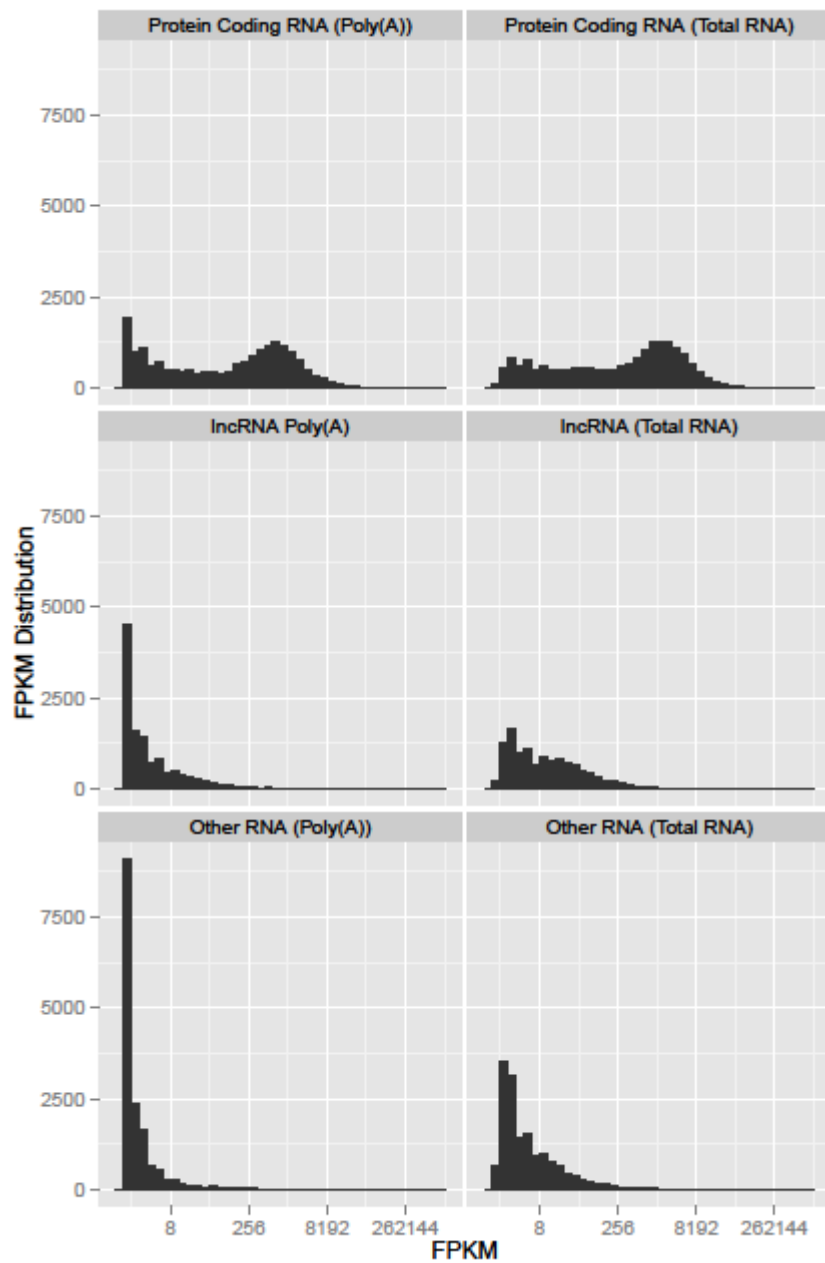

Figure S1. Normalized read count distribution of poly(A) and total RNA libraries for three types of RNA.
